# Supplementary material
Source: publisher figshare collection journal article supplement (https://gsajournals.figshare.com/ndownloader/files/17497430)
Supplement: Supplementary file 1 [file 17497430]

Table S1 Primer list

|  | Primer name | Sequence (5'-3') |
| --- | --- | --- |
| Protein localization | BnaAOX1b-GFPF | TGATCGCCGTTCAAGGCGTT |
|  | BnaAOX1b-GFPR | GTCACGGTGATGTGCTTCAT |
| *35S::BnaAOX1b* | BnaAOX1b-F | ATGATGATGAGTCGCTATGGAGC |
|  | BnaAOX1b-R | TCAATGATATCCAATTGGAGC |
| QPCR | BnaAOX1B-QF  BnaAOX1B-QR | TGATCGCCGTTCAAGGCGTT  GTCACGGTGATGTGCTTCAT |
| GAPC1-QF  GAPC1-QR | AACACCATGAGCTCAAGGTC  GATGACAACCTTCTTGGCAC |
| UGT74E2-QF  UGT74E2-QR | TCCAATGGCTTCCAAGAAGG  AGCTACATCAAGAAGCCACG |
| RDUF1-QF | CAACGTCGTATTGGTGCTAC |
| RDUF1-QR | TCATAAGGGCGTCGATCTCC |
| TMA7-QF  TMA7-QR | TTCCTGTGTTTTATCCATGTAGCC  CAGTCACTCTCCTACGAACATGATAG |
